# Supplementary material for: The Antimicrobial and Antibiofilm In Vitro Activity of Liquid and Vapour Phases of Selected Essential Oils against Staphylococcus aureus
Source: MDPI journal article supplement (doi:10.3390/pathogens10091207), 2021-09-17
Supplement: s1 [file s1]

## Supplementary materials

# The antimicrobial and antibiofilm *in vitro* activity of liquid and vapour phases of selected Essential Oils against *Staphylococcus aureus*

Malwina Brożyna <sup>1,\*</sup>, Justyna Paleczny <sup>1</sup>, Weronika Kozłowska <sup>2</sup>, Grzegorz Chodaczek <sup>3</sup>, Ruth Dudek-Wicher <sup>1</sup>, Anna Felińczak <sup>4</sup>, Joanna Gołębiewska <sup>5</sup>, Agata Górniak <sup>6</sup> and Adam Junka <sup>1,\*</sup>

<sup>1</sup> Department of Pharmaceutical Microbiology and Parasitology, Wrocław Medical University, 50-556 Wrocław, Poland; paleczny.justyna@gmail.com (J.P.); r.dudek.wicher@gmail.com (R.D.-W.)

<sup>2</sup> Department of Pharmaceutical Biology, Wrocław Medical University, 50-556 Wrocław, Poland; weronika.kozłowska@umed.wroc.pl (W.K.)

<sup>3</sup> Bioimaging Laboratory, Łukasiewicz Research Network—PORT Polish Center for Technology Development, 54-066 Wrocław, Poland; grzegorz.chodaczek@port.org.pl (G.C.)

<sup>4</sup> Department of Organisation and Management, Wrocław Medical University, 51-618 Wrocław, Poland; anna.felinczak@umed.wroc.pl (A.F.)

<sup>5</sup> Faculty of Medicine, Łazarski University, 02-662 Warsaw, Poland; joanna.golebiewska@lazarski.pl (J.G.)

<sup>6</sup> Laboratory of Elemental Analysis and Structural Research, Wrocław Medical University, 50-556 Wrocław, Poland; agata.gorniak@umed.wroc.pl (A.G.)

**Table S1.** Ingredients of tested EOs measured with GC-MS (Gas Chromatography Mass Spectrometry). Components which are in line with Polish Pharmacopea XI standards are marked green colour, the ones which are not in line are marked red. **RI** - retention index, **RT** - retention time

### A. Thyme oil

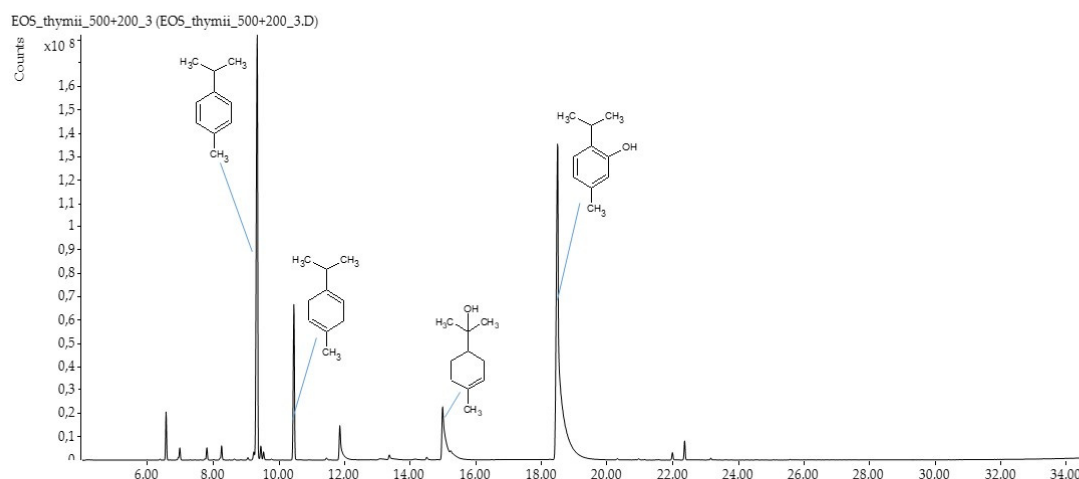

| RI          | RT           | Compound               | <i>T. vulgaris</i>                 |
|-------------|--------------|------------------------|------------------------------------|
| 937         | 6.56         | $\alpha$ -Pinene       | 2.20 $\pm$ 0.09                    |
| 949         | 6.98         | Camphene               | 0.73 $\pm$ 0.04                    |
| 975         | 7.80         | Sabinene               | 0.64 $\pm$ 0.03                    |
| 979         | 8.25         | $\beta$ -Pinene        | 0.81 $\pm$ 0.05                    |
| <b>1025</b> | <b>9.31</b>  | <b>p-Cymene</b>        | <b>26.91 <math>\pm</math> 0.99</b> |
| 1028        | 9.45         | Limonene               | 0.77 $\pm$ 0.04                    |
| 1060        | 10.47        | $\gamma$ -Terpinene    | 8.60 $\pm$ 0.03                    |
| 1096        | 11.85        | Linalool               | 3.45 $\pm$ 0.15                    |
| 1141        | 13.36        | Camphor                | 0.66 $\pm$ 0.06                    |
| 1189        | 14.99        | $\alpha$ -Terpineol    | 7.84 $\pm$ 0.30                    |
| <b>1289</b> | <b>18.49</b> | <b>Thymol</b>          | <b>44.00 <math>\pm</math> 0.46</b> |
| 1419        | 22.36        | $\beta$ -Caryophyllene | 1.00 $\pm$ 0.05                    |

Polish Pharmacopea XI ranges:

$\alpha$ - thujene: 0.2 per cent to 1.5 per cent

$\beta$ -myrcene: 1.0 per cent to 3.0 per cent

$\alpha$ - terpinene: 0.9 per cent to 2.6 per cent

p- cymene: 14.0 per cent to 28.0 per cent

$\gamma$ -terpinene: 4.0 per cent to 12.0 per cent

linalool: 1.5 per cent to 6.5 per cent

terpinen-4-ol: 0.1 per cent to 2.5 per cent

carvacrol methyl ether: 0.05 per cent to 1.5 per cent

thymol: 37.0 per cent to 55.0 per cent

carvacrol: 0.5 per cent to 5.5 per cent

## B. Tea tree oil

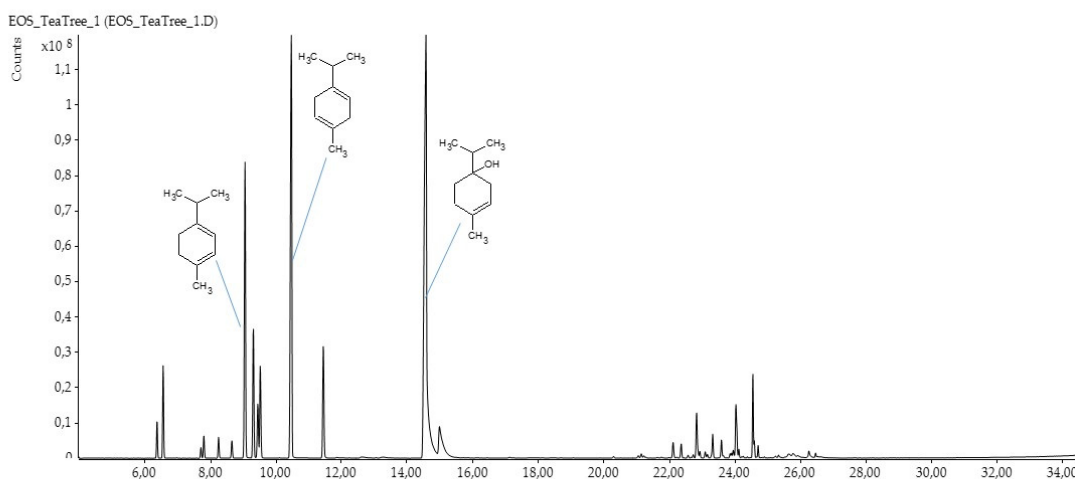

| RI          | RT           | Compound                             | <i>M. alternifolia</i>             |
|-------------|--------------|--------------------------------------|------------------------------------|
| 929         | 6.37         | $\alpha$ -Thujene                    | $1.11 \pm 0.02$                    |
| 937         | 6.56         | $\alpha$ -Pinene                     | $2.85 \pm 0.06$                    |
| 975         | 7.80         | Sabinene                             | $0.75 \pm 0.02$                    |
| 979         | 8.25         | $\beta$ -Pinene                      | $0.69 \pm 0.01$                    |
| 1005        | 8.65         | $\alpha$ -Phellandrene               | $0.61 \pm 0.01$                    |
| <b>1017</b> | <b>9.06</b>  | <b><math>\alpha</math>-Terpinene</b> | <b><math>11.07 \pm 0.17</math></b> |
| 1025        | 9.31         | p-Cymene                             | $4.69 \pm 0.07$                    |
| 1028        | 9.45         | Limonene                             | $2.08 \pm 0.05$                    |
| 1031        | 9.52         | 1,8-Cineole                          | $3.34 \pm 0.06$                    |
| <b>1060</b> | <b>10.47</b> | <b><math>\gamma</math>-Terpinene</b> | <b><math>19.07 \pm 0.27</math></b> |
| 1088        | 11.44        | $\alpha$ -Terpinolene                | $4.34 \pm 0.06$                    |
| <b>1177</b> | <b>14.58</b> | <b>Terpinen-4-ol</b>                 | <b><math>33.27 \pm 0.79</math></b> |
| 1189        | 14.99        | $\alpha$ -Terpineol                  | $3.26 \pm 0.13$                    |
| 1419        | 22.36        | $\beta$ -Caryophyllene               | $0.53 \pm 0.01$                    |
| 1440        | 22.83        | Aromadendrene                        | $1.83 \pm 0.03$                    |
| 1460        | 23.32        | Alloaromadendrene                    | $0.82 \pm 0.02$                    |
| 1496        | 24.03        | Viridiflorene                        | $2.35 \pm 0.04$                    |
| 1518        | 24.55        | $\beta$ -Cadinene                    | $2.78 \pm 0.03$                    |

Polish Pharmacopea XI ranges:

$\alpha$ -pinene: 1.0 per cent to 6.0 per cent

sabinene: maximum 3.5 per cent

$\alpha$ -terpinene: 5.0 per cent to 13.0 per cent

limonene: 0.5 per cent to 4.0 per cent  
 cineole: maximum 15.0 per cent  
 $\gamma$ -terpinene: 10.0 per cent to 28.0 per cent  
 p- cymene: 0.5 per cent to 12.0 per cent  
 terpinolene: 1.5 per cent to 5.0 per cent  
 terpinen-4-ol: minimum 30.0 per cent  
 aromadendrene: maximum 7.0 per cent  
 $\alpha$ - terpineol: 1.5 per cent to 8.0 per cent

### C. Basil oil

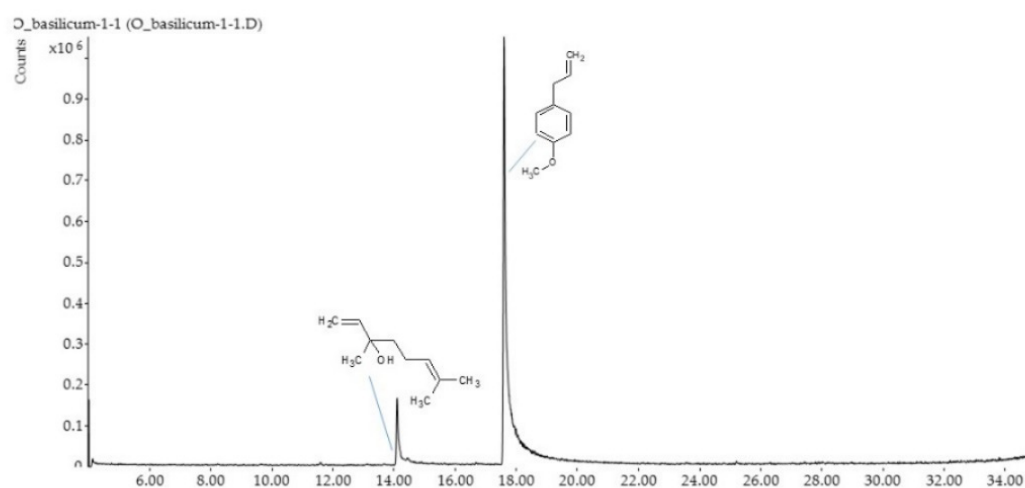

| RI   | RT    | Compound                    | <i>O.basilicum</i> |
|------|-------|-----------------------------|--------------------|
| 1095 | 14.08 | Linalool                    | 10.69±1.13         |
| 1192 | 17.59 | Methyl chavicol [Estragole] | 89.31±1.13         |

Not included in Polish Pharmacopea XI

## D. Rosemary oil

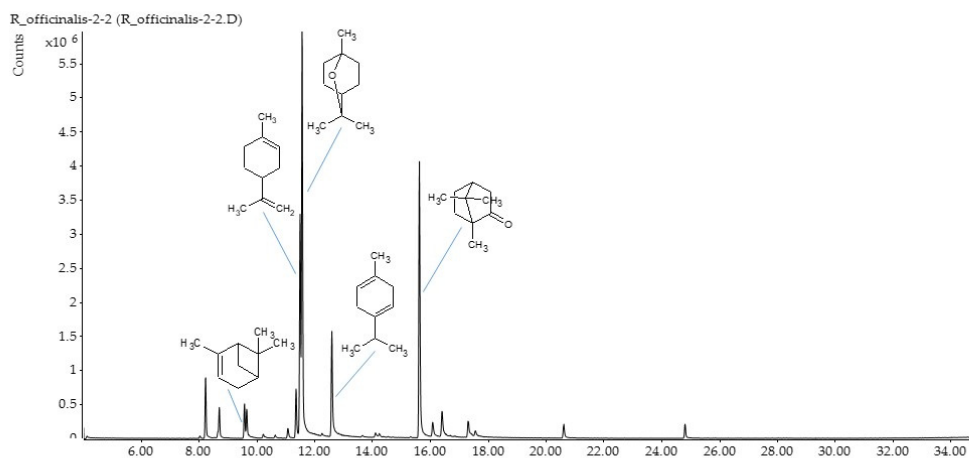

| RI          | RT           | Compound                        | <i>R.officinalis</i> |
|-------------|--------------|---------------------------------|----------------------|
| 896         | 8.22         | Cyclofenchene                   | 4.99±0.48            |
| 908         | 8.69         | 2-Bornene                       | 3.00±0.29            |
| 924         | 9.57         | β-Thujene                       | 2.33±0.11            |
| 932         | 9.65         | α-Pinene                        | 2.58±0.28            |
| 988         | 10.22        | Myrcene                         | 0.38±0.14            |
| 1002        | 10.63        | α-Phellandrene                  | 0.23±0.07            |
| 1014        | 11.07        | α-Terpinene                     | 0.80±0.04            |
| 1022        | 11.35        | o-Cymene                        | 3.15±1.45            |
| <b>1024</b> | <b>11.49</b> | <b>Limonene</b>                 | <b>14.26±0.99</b>    |
| <b>1026</b> | <b>11.57</b> | <b>1,8-Cineole [Eucalyptol]</b> | <b>30.12±1.74</b>    |
| 1054        | 12.59        | γ-Terpinene                     | 8.21±0.35            |
| <b>1141</b> | <b>15.64</b> | <b>Camphor</b>                  | <b>21.97±0.77</b>    |
| 1156        | 16.08        | Isoborneol                      | 1.53±0.06            |
| 1165        | 16.40        | Borneol                         | 2.69±0.09            |
| 1186        | 17.32        | α-Terpineol                     | 1.56±0.39            |
| 1284        | 20.61        | Bornyl acetate                  | 1.17±0.09            |
| 1417        | 24.80        | Caryophyllene                   | 0.85±0.21            |

Polish Pharmacopea XI ranges:

For rosemary oil, **Spanish type**, the percentages are within the following ranges:

α-pinene: 18 per cent to 26 per cent  
 camphene: 8.0 per cent to 12.0 per cent  
 β-pinene: 2.0 per cent to 6.0 per cent  
 β-myrcene: 1.5 per cent to 5.0 per cent  
 limonene: 2.5 per cent to 5.0 per cent  
 cineole: 16.0 per cent to 25.0 per cent  
 p-cymene: 1.0 per cent to 2.2 per cent

camphor: 13.0 per cent to 21.0 per cent

bornyl acetate: 0.5 per cent to 2.5 per cent

$\alpha$ -terpineol: 1.0 per cent to 3.5 per cent

borneol: 2.0 per cent to 4.5 per cent

verbenone: 0.7 per cent to 2.5 per cent

For rosemary oil, **Moroccan and Tunisian type**, the percentages are within the following ranges:

$\alpha$ -pinene: 9.0 per cent to 14.0 per cent

camphene: 2.5 per cent to 6.0 per cent

$\beta$ -pinene: 4.0 per cent to 9.0 per cent

$\beta$ -myrcene: 1.0 per cent to 2.0 per cent

limonene: 1.5 per cent to 4.0 per cent

cineole: 38.0 per cent to 55.0 per cent

p-cymene: 0.8 per cent to 2.5 per cent

camphor: 5.0 per cent to 15.0 per cent

bornyl acetate: 0.1 per cent to 1.5 per cent

$\alpha$ -terpineol: 1.0 per cent to 2.6 per cent

borneol: 1.5 per cent to 5.0 per cent

verbenone: maximum 0.4 per cent

## E. Eucalyptus oil

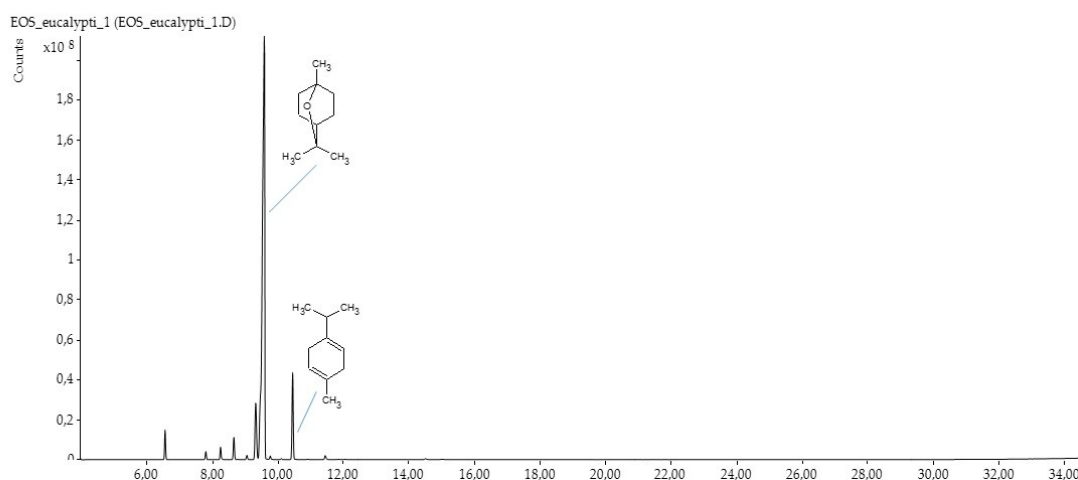

| RI   | RT    | Compound               | <i>E. globulus</i> |
|------|-------|------------------------|--------------------|
| 937  | 6.56  | $\alpha$ -Pinene       | $2.30 \pm 0.04$    |
| 979  | 8.25  | $\beta$ -Pinene        | $1.09 \pm 0.02$    |
| 1005 | 8.65  | $\alpha$ -Phellandrene | $2.02 \pm 0.02$    |
| 1025 | 9.31  | p-Cymene               | $6.89 \pm 0.07$    |
| 1031 | 9.52  | 1,8-Cineole            | $79.10 \pm 0.61$   |
| 1060 | 10.47 | $\gamma$ -Terpinene    | $8.16 \pm 0.07$    |

Polish Pharmacopea XI ranges

$\alpha$ -pinene: 0.05 per cent to 10.0 per cent  
 $\beta$ -pinene: 0.05 per cent to 1.5 per cent  
sabinene: maximum 0.3 per cent  
 $\alpha$ -phellandrene: 0.05 per cent to 1.5 per cent  
limonene: 0.05 per cent to 15.0 per cent  
1,8-cineole: minimum 70.0 per cent  
camphor: maximum 0.1 per cent

## F. Menthol mint oil

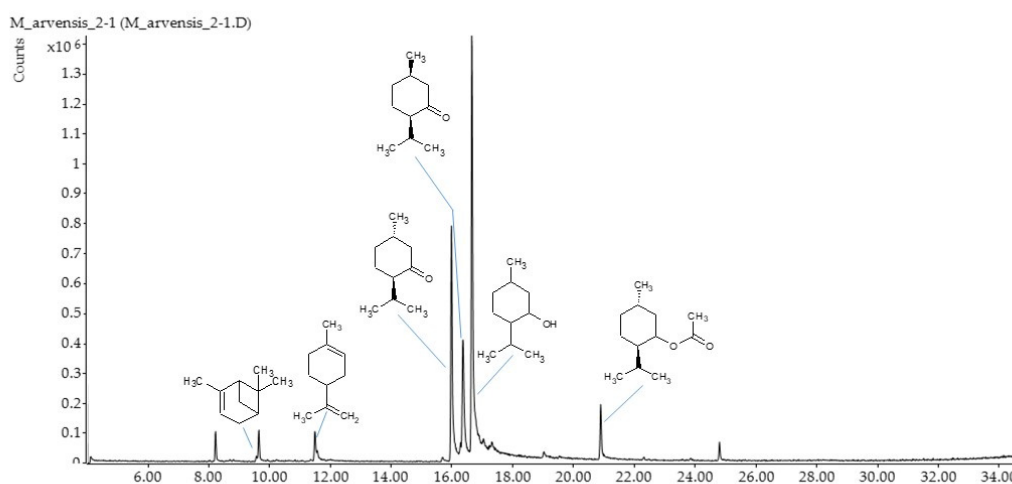

| RI          | RT           | Compound           | <i>M.arvensis</i> |
|-------------|--------------|--------------------|-------------------|
| 896         | 8.22         | Cyclofenchene      | 2.68±0.17         |
| 932         | 9.65         | $\alpha$ -Pinene   | 3.01±0.17         |
| 1024        | 11.49        | Limonene           | 3.78±0.27         |
| <b>1148</b> | <b>15.98</b> | <b>Menthone</b>    | <b>24.53±0.23</b> |
| <b>1158</b> | <b>16.36</b> | <b>Isomenthone</b> | <b>13.54±1.75</b> |
| <b>1167</b> | <b>16.66</b> | <b>Menthol</b>     | <b>45.57±2.21</b> |
| 1294        | 20.89        | Menthyl acetate    | 5.61±0.36         |
| 1417        | 24.80        | Caryophyllene      | 1.27±0.57         |

Polish Pharmacopea XI ranges:

limonene: 1.5 per cent to 7.0 per cent  
 cineole: maximum 1.5 per cent  
 menthone: 17.0 per cent to 35.0 per cent  
 isomenthone: 5.0 per cent to 13.0 per cent  
 menthyl acetate: 1.5 per cent to 7.0 per cent  
 isopulegol: 1.0 per cent to 3.0 per cent  
 menthol: 30.0 per cent to 50.0 per cent  
 pulegone: maximum 2.5 per cent  
 carvone: maximum 2.0 per cent  
 The ratio of cineole content to limonene content is less than 1.

## G. Lavender oil

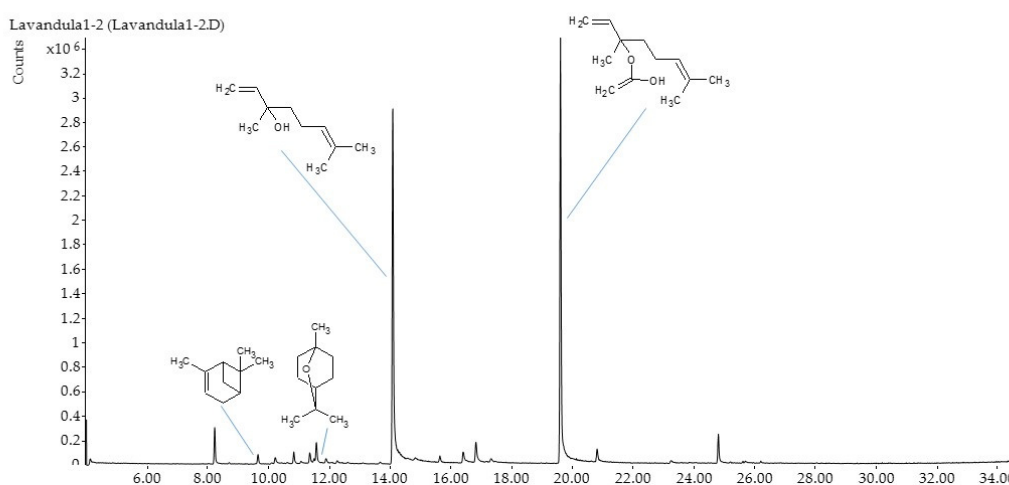

| RI          | RT           | Compound                 | <i>L. angustifolia</i> |
|-------------|--------------|--------------------------|------------------------|
| 896         | 8.22         | Cyclofenchene            | 3.66±0.35              |
| 932         | 9.65         | $\alpha$ -Pinene         | 0.94±0.04              |
| 988         | 10.22        | Myrcene                  | 0.86±0.13              |
| 1008        | 10.83        | 3-Carene                 | 1.19±0.12              |
| 1022        | 11.35        | o-Cymene                 | 1.19±0.12              |
| 1026        | 11.57        | 1,8-Cineole [Eucalyptol] | 2.56±0.39              |
| <b>1095</b> | <b>14.08</b> | <b>Linalool</b>          | <b>37.76±1.18</b>      |
| 1141        | 15.64        | Camphor                  | 0.84±0.10              |

|             |              |                        |                   |
|-------------|--------------|------------------------|-------------------|
| 1165        | 16.40        | Borneol                | 2.04±0.56         |
| 1174        | 16.82        | Terpinen-4-ol          | 3.03±0.46         |
| <b>1254</b> | <b>19.60</b> | <b>Linalyl acetate</b> | <b>41.13±0.40</b> |
| 1288        | 20.81        | Lavandulyl acetate     | 1.80±0.22         |
| 1417        | 24.80        | Caryophyllene          | 3.47±0.66         |

Polish Pharmacopea XI ranges

limonene: maximum 1.0 per cent  
 1,8-cineole: maximum 2.5 per cent  
 3-octanone: 0.1 per cent to 5.0 per cent  
 camphor: maximum 1.2 per cent  
 linalool: 20.0 per cent to 45.0 per cent  
 linalyl acetate: 25.0 per cent to 47.0 per cent  
 terpinen-4-ol: 0.1 per cent to 8.0 per cent  
 lavandulyl acetate: minimum 0.2 per cent  
 lavandulol: minimum 0.1 per cent  
 α-terpineol: maximum 2.0 per cent

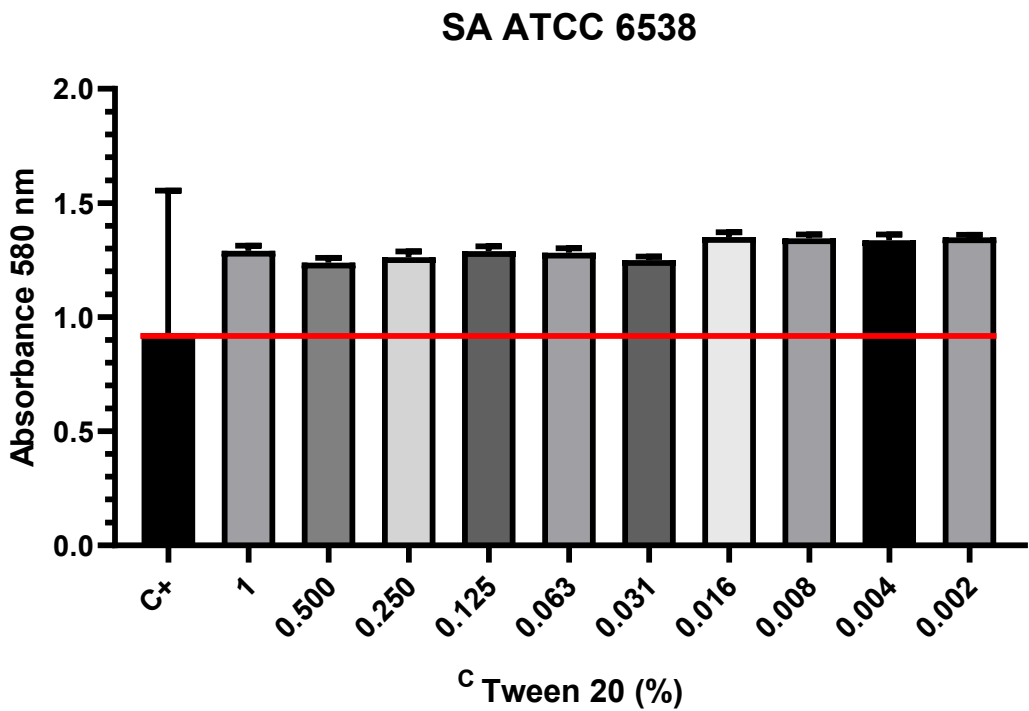

**Figure S1.** Influence of different concentrations of Tween 20 [(%) (v/v)] on planktonic forms of *S. aureus* ATCC 6538 strain. C+ untreated cells.

MBC-B (%)

| T- EO        |       | TT-EO         |       | B-EO          |       | R-EO          |       | M-EO          |       | L-EO   |       |
|--------------|-------|---------------|-------|---------------|-------|---------------|-------|---------------|-------|--------|-------|
| Strain       | MBC-B | Strain        | MBC-B | Strain        | MBC-B | Strain        | MBC-B | Strain        | MBC-B | Strain | MBC-B |
| SA 5         | 0.05  | SA 2          | 25    | SA 4          | 50    | 2             | 12.5  | SA 32         | 50    | SA 2   | 25    |
| SA 6         | 0.1   | SA 4          | 12.5  | SA 29         | 50    | 4             | 6.3   | SA 34         | 50    |        |       |
| SA 7         | 0.05  | SA 5          | 25    | SA 32         | 12.5  | 7             | 50    | SA 35         | 50    |        |       |
| SA 10        | 0.05  | SA 27         | 50    | SA 34         | 25    | 27            | 12.5  | SA ATCC 33591 | 25    |        |       |
| SA 26        | 0.05  | SA 28         | 3.1   | SA ATCC 33591 | 25    | 33            | 25    | SA ATCC 6538  | 50    |        |       |
| SA 27        | 0.05  | SA 32         | 6.3   | SA ATCC 6538  | 12.5  | 34            | 25    |               |       |        |       |
| SA 32        | 0.1   | SA 33         | 6.3   |               |       | 35            | 50    |               |       |        |       |
| SA 33        | 0.1   | SA 34         | 6.3   |               |       | SA ATCC 33591 | 12.5  |               |       |        |       |
| SA ATCC 6538 | 0.4   | SA ATCC 33591 | 1.6   |               |       |               |       |               |       |        |       |

**Table S2.** The MBC- B [(%) (v/v)] (minimal bactericidal concentration for biofilm) values of EOs emulsions. T-EO- thyme oil, TT-EO- tea tree oil, B- EO- basil oil, R-EO- rosemary oil, M-EO- menthol mint oil, L- EO- lavender oil
